# Supplementary material
Source: publisher figshare collection journal article supplement (https://asha.figshare.com/ndownloader/files/23936672)
Supplement: Supplementary file 1 [file 23936672]

## **Subject-Focused Stimuli**

- 1A. The girl that held the key above the table was happy.
- 1B. The man that held the fork in his hand was sad.
- 2A. The car that hit the tree next to the street was blue.
- 2B. The boy that hit the ball into the air was happy.
- 3A. The sock that was on the floor was striped.
- 3B. The shirt that was on the hanger was blue.
- 4A. The girl that opened the shed with her hand was sad.
- 4B. The man that opened the door with a key was happy.
- 5A. The sea lion that barked at the bird was tan.
- 5B. The dog that barked at the man was brown.
- 6A. The man that gave the money to the lady was tall.
- 6B. The boy that gave the bills to the girl was short.
- 7A. The man that threw the ball in the park was wearing a hat.
- 7B. The boy that threw the Frisbee in the backyard was wearing a jacket.
- 8A. The fox that chased the butterfly in the air was jumping.
- 8B. The horse that chased the dog in the field was running.
- 9A. The cake that had a flower on the top was on the table.
- 9B. The cookie that had chocolate chips in the dough was in the jar.
- 10A. The pig that sat in the mud was hungry.
- 10B. The man that sat in the chair was tired.
- 11A. The bird that flew over the barn was black.

- 11B. The dog that sat on the grass was brown.
- 12A. The boy that rode his bike to school had a green backpack.
- 12B. The girl that played on the swings had a purple jacket.
- 13A. The bear that ate the berries from the bush was still hungry.
- 13B. The cat that drank the milk from a bowl was still thirsty.
- 14A. The lady that saw the mouse on the table was screaming.
- 14B. The boy that held the bunny in his arms was laughing.
- 15A. The mom that read a book to the baby had a white shirt on.
- 15B. The lady that watched the man on the TV had a red dress on.
- 16A. The boy that wrote the letter with a pencil was sitting in a chair.
- 16B. The man that read the book in his hands was relaxed.
- 17A. The glove that lay behind the ball was brown.
- 17B. The shoes that sat next to the box were red.
- 18A. That girl that brushed her teeth with a toothbrush had a red robe on.
- 18B. The boy that combed his hair with a comb had a yellow sweater on.
- 19A. The dog that chased the bone over the hill wanted some food.
- 19B. The cat that climbed a tree in the forest wanted the bird.
- 20A. The girl that cleaned the bathtub in the house had a white shirt on.
- 20B. The boy that built the snowman in the snow wore a yellow hat.
- 21A. The girl that put the butterfly in the net wore a blue hat.
- 21B. The boy that put the bird in the cage had a red shirt on.
- 22A. The man that caught the fish from the river was tall.
- 22B. The woman that caught the raccoon in the trash was short.

- 23A. The girl that poured the milk onto the cereal had a purple headband.
- 23B. The woman that poured the juice into the glass wore a white shirt.
- 24A. The woman that performed a song for the show had a pink dress on.
- 24B. The dog that performed a trick for the boy sat on the floor.
- 25A. The boy that brought a toy to the school wore a yellow shirt.
- 25B. The dog that brought a stick to the man had black fur.
- 26A. The girl that toasted a marshmallow over the fire sat on a log.
- 26B. The woman that toasted sliced bread in the toaster had a black belt.
- 27A. The woman that unpacked the dishes from a box was tall.
- 27B. The man that unpacked the clothes from the suitcase had a tie on.
- 28A. The mom that cut the cake at the party had brown hair.
- 28B. The man that cut the pizza on the counter wore a red apron.
- 29A. The dog that scared the man on the pole barked loudly.
- 29B. The girl that scared the boy behind the tree had a yellow helmet on.
- 30A. The woman that pushed the stroller down the sidewalk walked slowly.
- 30B. The boy that pushed the chair across the room had no shoes on.
- 31A. The girl that pulled the sled up the hill wore a red coat.
- 31B. The dog that carried the ball through the grass was small.
- 32A. The man that cleaned the chairs in the car had a white shirt.
- 32B. The woman that buttoned the dress on the girl knelt on the floor.
- 33A. The boy’s dad that tossed the ball in the pool was tall.
- 33B. The girl’s dog that followed the cat across the hill was brown.
- 34A. The girl that stomped her foot on the toy was mad.

- 34B. The boy that grabbed the toy from the box was happy.
- 35A. The woman that walked the boy to the park had black pants.
- 35B. The boy that dropped the paper into the trash had a striped shirt.
- 36A. The man that gave the ball to the boy sat on the grass.
- 36B. The woman that stirred the soup on the stove wore a striped apron.
- 37A. The dog that drank the water in the bowl had a black nose.
- 37B. The cat that chased the mouse to the hole was orange.
- 38A. The woman’s son that shared his food with the dog had red shoes.
- 38B. The girl’s dad that pulled the sled on the snow had sunglasses on.
- 39A. The horse that pulled the wagon on the road was big.
- 39B. The boy that rode his bike on the path had a helmet on.
- 40A. The bear that watched the bee in the air held a basket.
- 40B. The mouse that ate the cheese on the plate was hungry.

## **Object-Focused Stimuli**

- 1A. The wheat that the farmer planted in the ground was small.
- 1B. The flower that the lady planted in the dirt was yellow.
- 2A. The axe that the lumberjack carried by the road was big.
- 2B. The baby that the mom carried in her arms was tired.
- 3A. The vegetable that the cook washed in the sink was red.
- 3B. The window that the girl washed with a rag was dirty.
- 4A. The mountain that the goat climbed during the day was tall.
- 4B. The tree that the monkey climbed by himself had green leaves.
- 5A. The door that the man closed with his hand was white.
- 5B. The box that the woman closed with her fingers was blue.
- 6A. The tooth that the nut cracked with its shell was white.
- 6B. The screen that the ball cracked with its side was blue.
- 7A. The baby that the dad fed on the couch was hungry.
- 7B. The kitten that the mom fed on the floor was black.
- 8A. The lady that the boy helped on the sidewalk was old.
- 8B. The children that the policeman helped across the street held a balloon.
- 9A. The cat that that boy kissed on the cheek was small.
- 9B. The puppy that the girl kissed on its ear was brown.
- 10A. The car that the woman parked on the road was red.
- 10B. The bike that the kid parked by the tree had black wheels.
- 11A. The apron that the lady ironed on a ironing board was pink.

- 11B. The ball that the kid bounced on the ground was brown.
- 12A. The tree that the car hit with its bumper was blue.
- 12B. The plant that the deer ate in the forest was green.
- 13A. The grass that the fire burned in the field was dead.
- 13B. The ball that the mule kicked with its legs was black and white.
- 14A. The girl that the boy pushed under the tree had a red shirt.
- 14B. The baseball that the man caught with a glove was white.
- 15A. The horse that the lady rode with a saddle was big.
- 15B. The car that the man drove during the night was black.
- 16A. The boy that the bully chased in the yard was scared.
- 16B. The dishes that the woman washed with a sponge were wet.
- 17A. The house that the man painted with a paintbrush was old.
- 17B. The cake that the cook baked in the oven was delicious.
- 18A. The book that the teacher read to the children was exciting.
- 18B. The song that the children sung in the snow was beautiful.
- 19A. The paper that the child cut with some scissors was green.
- 19B. The pencil that the girl sharpened on the table was long.
- 20A. The lollipop that the boy licked in the yard was big.
- 20B. The bone that the dog buried under a tree was white.
- 21A. The dog that the girl groomed with a brush was brown.
- 21B. The hair that the man groomed with a comb was short.
- 22A. The grass that the man cut with a lawnmower was tall.
- 22B. The paper that the girl cut with her scissors was white.

- 23A. The lady that the boy hugged in the snow was smiling.
- 23B. The cat that the girl hugged on the floor was spotted.
- 24A. The girl that the man pushed on the swing was happy.
- 24B. The sled that the girl pushed over the snow was brown.
- 25A. The soup that the man cooked on the stove was hot.
- 25B. The bread that the woman cooked in the microwave was burnt.
- 26A. The dog that the children washed in the tub was wet.
- 26B. The car that the man washed in the driveway was silver.
- 27A. The doll that the girl held in her arms was small.
- 27B. The boy that the man held on his shoulders was young.
- 28A. The apple that the boy grabbed from the tree was green.
- 28B. The toy that the girl grabbed from the sand was red.
- 29A. The wall that the woman painted in the house was green.
- 29B. The car that the man painted in a garage was blue.
- 30A. The berries that the girl ate at the table were red.
- 30B. The donut that the boy ate in the yard was pink.
- 31A. The mouse that the cat chased on the grass was brown.
- 31B. The rug that the man cleaned with a vacuum was white.
- 32A. The worm that the bird ate in the yard was slimy.
- 32B. The doll that the girl carried in her arms was small.
- 33A. The flower that the monster watered in the yard was pink.
- 33B. The nut that the squirrel ate on the ground was brown.
- 34A. The car that the woman drove on the road was red.

- 34B. The boat that the boy sailed on the water was purple.
- 35A. The egg that the woman cracked in the bowl was white.
- 35B. The cow that the man milked in the field was spotted.
- 36A. The berries that the boy picked from the bush were blue.
- 36B. The castle that the girl made on the beach was short.
- 37A. The nest that the bird made on the rock was brown.
- 37B. The fish that the bear caught in the river was slippery.
- 38A. The bike that the man rode on the street was blue.
- 38B. The barn that the farmer painted with a brush was grey.
- 39A. The bubble that the boy blew with his gum was big.
- 39B. The shirt that the woman sewed with a needle was green.
- 40A. The puppy that the boy held in his arms was brown.
- 40B. The carrot that the rabbit ate on the floor was orange.
